# Supplementary material for: Specific Medicinal Plant Polysaccharides Effectively Enhance the Potency of a DC-Based Vaccine against Mouse Mammary Tumor Metastasis
Source: PubMed Central journal article supplement (PMC4380423; doi:10.1371/journal.pone.0122374), 2015-03-31
Supplement: pone.0122374.s009.pdf [file pone.0122374.s009.pdf]

**S1 Table. Stimulation (in fold change\*) of all 40 cytokines and chemokines in DCs-treated with Cp, Am, [Am+Cp] or LPS groups compared to control group\*\***

|    | Cytokines/Chemokines | Alternate Nomenclature  | Cp    | Am    | [Am+Cp] | LPS   |
|----|----------------------|-------------------------|-------|-------|---------|-------|
| 1  | IL-6                 | —                       | 10.23 | 14.18 | 12.12   | 9.95  |
| 2  | G-CSF                | —                       | 7.37  | 6.82  | 10.60   | 15.58 |
| 3  | MIP-1 $\alpha$       | CCL3                    | 11.15 | 4.96  | 9.16    | 10.74 |
| 4  | I-309                | CCL1/TCA-3              | 6.61  | 5.93  | 7.11    | 9.03  |
| 5  | TNF- $\alpha$        | —                       | 4.62  | 4.32  | 6.99    | 5.16  |
| 6  | IL-1 $\beta$         | IL-1F2                  | 6.36  | 5.89  | 5.38    | 9.86  |
| 7  | IL-1 $\alpha$        | IL-1F1                  | 3.75  | 3.27  | 4.95    | 6.08  |
| 8  | IP-10                | CXCL10/CRG-2            | 4.85  | 6.82  | 4.80    | 5.59  |
| 9  | MIP-2                | CXCL2                   | 3.62  | 5.81  | 3.62    | 3.31  |
| 10 | JE                   | CCL2M/CP-1              | 1.80  | 2.08  | 3.31    | 2.71  |
| 11 | MIG                  | CXCL9                   | 3.24  | 2.90  | 3.12    | 4.13  |
| 12 | KC                   | CXCL1                   | 1.72  | 2.37  | 3.12    | 2.38  |
| 13 | IL-5                 | —                       | 2.42  | 3.92  | 3.11    | 2.29  |
| 14 | MIP-1 $\beta$        | CCL4                    | 6.15  | 2.66  | 2.68    | 18.41 |
| 15 | IL-7                 | —                       | 1.85  | 3.05  | 2.64    | 1.89  |
| 16 | GM-CSF               | —                       | 2.51  | 4.31  | 2.49    | 2.27  |
| 17 | M-CSF                | —                       | 1.46  | 1.93  | 2.35    | 1.57  |
| 18 | TREM-1               | —                       | 1.24  | 1.43  | 2.17    | 1.33  |
| 19 | IL-10                | —                       | 2.63  | 1.96  | 2.02    | 2.59  |
| 20 | I-TAC                | CXCL11                  | 1.76  | 2.96  | 1.90    | 1.93  |
| 21 | C5/C5a               | Complement Component 5a | 1.23  | 1.71  | 1.69    | 1.31  |
| 22 | IL-17                | —                       | 2.10  | 3.63  | 1.68    | 1.92  |
| 23 | MCP-5                | CCL12                   | 1.25  | 1.89  | 1.67    | 1.38  |
| 24 | IL-3                 | —                       | 1.19  | 2.44  | 1.27    | 1.51  |
| 25 | IL-4                 | —                       | 0.89  | 1.33  | 1.17    | 0.97  |
| 26 | sICAM-1              | CD54                    | 1.04  | 1.44  | 1.12    | 0.80  |
| 27 | BLC                  | CXCL13/BCA1             | 0.98  | 1.70  | 1.09    | 0.97  |
| 28 | TIMP-1               | —                       | 0.64  | 1.01  | 1.09    | 1.03  |
| 29 | Eotaxin              | CCL11                   | 1.31  | 1.71  | 1.00    | 0.85  |
| 30 | TARC                 | CCL17                   | 0.82  | 1.39  | 0.97    | 0.91  |
| 31 | IL-12p70             | —                       | 1.91  | 2.48  | 0.96    | 1.09  |
| 32 | IL-27                | —                       | 1.13  | 1.49  | 0.96    | 0.80  |
| 33 | SDF-1                | CXCL12                  | 1.03  | 1.39  | 0.95    | 0.47  |
| 34 | IL-23                | —                       | 1.13  | 1.74  | 0.94    | 0.85  |
| 35 | IFN- $\gamma$        | —                       | 1.14  | 1.66  | 0.92    | 0.92  |
| 36 | IL-13                | —                       | 1.48  | 1.87  | 0.91    | 0.72  |
| 37 | RANTES               | CCL5                    | 0.64  | 0.87  | 0.87    | 0.68  |
| 38 | IL-16                | —                       | 0.79  | 1.02  | 0.81    | 0.73  |
| 39 | IL-2                 | —                       | 1.15  | 1.84  | 0.80    | 0.53  |
| 40 | IL-1ra               | IL-1F3                  | 1.02  | 1.45  | 0.77    | 0.73  |

\* Fold change = treatment group/control untreated group

\*\* Control group: DC+TCL
